# 1 Behavioural and transcriptomic characterization of the comorbidity between 2 Alzheimer's disease and Major Depression

3 Ana Martín-Sánchez<sup>1</sup>, Janet Piñero<sup>2</sup>, Lara Nonell<sup>2,3</sup>, Magdalena Arnal<sup>2</sup>, Elena M. Ribe<sup>4</sup>, Alejo  
4 Nevado-Holgado<sup>4,5</sup>, Simon Lovestone<sup>4,6</sup>, Ferran Sanz<sup>2</sup>, Laura I. Furlong<sup>2</sup>, Olga Valverde<sup>1\*</sup>

5  
6 <sup>1</sup> Neurobiology of Behaviour Research Group (GRNeC-NeuroBio), Department of  
7 Experimental and Health Sciences, Universitat Pompeu Fabra; Neuroscience Research Program,  
8 IMIM-Hospital del Mar Research Institute, Barcelona, Spain.

9 <sup>2</sup> Research Programme on Biomedical Informatics (GRIB), IMIM (Hospital del Mar Medical  
10 Research Institute), Universitat Pompeu Fabra, Barcelona, Spain.

11 <sup>3</sup> MARGenomics core facility, IMIM (Hospital del Mar Medical Research Institute), Barcelona,  
12 Spain.

13 <sup>4</sup> Department of Psychiatry, University of Oxford, Oxford OX3 7JX, UK

14 <sup>5</sup> Oxford Health NHS Foundation Trust, Oxford OX3 7JX, UK

15 <sup>6</sup> currently at Janssen-Cilag, UK

16  
17 \*Correspondence should be addressed to:

18 Olga Valverde

19 Department of Experimental and Health Sciences (DCEXS)

20 Universitat Pompeu Fabra

21 Carrer Doctor Aiguader 88, Barcelona 08003 Spain

22 Tel: +34 93 316 08 67

23 E-mail: [olga.valverde@upf.edu](mailto:olga.valverde@upf.edu)

## 24 ABSTRACT

25 Major Depression (MD) is the most prevalent psychiatric disease in the population and is  
26 considered a prodromal stage of the Alzheimer's disease (AD). Despite both diseases having a  
27 robust genetic component, the common transcriptomic signature remains unknown. In this regard,  
28 we investigated the cognitive and emotional responses in 3- and 6-month-old in APP/PSEN1-Tg  
29 mutant mice, before  $\beta$ -amyloid plaques were detected. Then, we studied the deregulation of genes  
30 and pathways in prefrontal cortex, striatum, hippocampus and amygdala, using transcriptomic  
31 and functional data analysis. The results demonstrated that depressive-like and anxiety-like  
32 behaviours, as well as memory impairments are already present at 3-month-old together with the  
33 deregulation of several genes and gene sets, including components of the circadian rhythms,  
34 electronic transport chain and neurotransmission. Finally, DisGeNET GSEA provides  
35 translational support for common downregulated gene sets related to MD and AD. Altogether, the  
36 results demonstrate that MD could be an early manifestation of AD.

## 37 ABBREVIATIONS

|      |                                                    |
|------|----------------------------------------------------|
| AD   | Alzheimer's disease                                |
| APP  | Beta-Amyloid precursor protein                     |
| BSPD | Behavioural and psychological symptoms of dementia |
| DE   | Differential expression                            |

|       |                                                                   |
|-------|-------------------------------------------------------------------|
| EPM   | Elevated plus maze                                                |
| FC    | Fold change                                                       |
| FDR   | False discovery rate                                              |
| GSEA  | Gene set enrichment analysis                                      |
| GWAS  | Genome-wide association study                                     |
| ICD-9 | International Classification of Diseases, 9 <sup>th</sup> Edition |
| MD    | Major Depression                                                  |
| NES   | Normalized enrichment score                                       |
| NOR   | Novel object recognition                                          |
| OF    | Open field                                                        |
| PFC   | Prefrontal cortex                                                 |
| PSEN1 | Presenilin-1                                                      |
| TST   | Tail suspension test                                              |

38

## 39 INTRODUCTION

40 Depressive disorder affects over 4.4% of the population<sup>1</sup>, and it is characterized by  
41 feelings of sadness, anhedonic state, changes in appetite and sleep, feelings of worthlessness,  
42 guilt, and may lead to attempts of suicide<sup>1</sup>. Major Depression (MD) manifests throughout the life  
43 course. In older people it is often associated with poor cognition that may not return to normality  
44 with effective treatment of the mood disorder<sup>2,3</sup>. In addition to the cognitive phenotype of MD in  
45 older people, a substantial body of data strongly suggests onset of MD in later life is associated  
46 with increased risk of Alzheimer's disease (AD), the commonest form of dementia<sup>4-6</sup>.  
47 Furthermore, although cognitive and functional impairments are the predominant symptoms of  
48 AD, other behavioural and psychological symptoms of dementia (BPSD) that include depression,  
49 sleep and activity disturbance are common manifestations of the disease<sup>7,8</sup>. These observations  
50 have led to the suggestion that MD may in some cases be a prodromal phase of AD. Indeed, both  
51 MD and AD have a considerable heritable component and share some mechanistic components  
52 including neuroinflammation<sup>9,10</sup>, oxidative stress<sup>11</sup>, certain dysregulations in cellular signalling<sup>12</sup>  
53 and neurotransmission<sup>13,14</sup> amongst others.

54 Despite these advances, the aetiology of the comorbidity between AD and MD remains  
55 unknown although the observation that multiple behaviours that are reminiscent of BPSD are also  
56 observed in rodent models of disease<sup>15</sup> suggesting that there might have common molecular  
57 processes. Hereby, we study for the first time, using behavioural, transcriptomic and  
58 bioinformatic approaches, depressive-like symptoms in an AD mouse model (APP/PSEN1-Tg  
59 mice) at ages before the neuropathological features are manifest and when cognitive impairment  
60 is not evident<sup>16</sup>. To that end, we have performed RNA sequencing analyses to study changes that  
61 occur in brain areas related to the control of behavioural and cognitive behaviours, including  
62 prefrontal cortex (PFC), striatum, hippocampus and amygdala, in mice at 3 and 6 months old. In  
63 order to study the mechanisms involved in the AD-MD comorbidity, a pre-ranked Gene Set  
64 Enrichment Analysis (GSEA) has been carried out. Using the transcriptomic results, we evaluated  
65 the enrichment in genes sets obtained from public resources containing functional and disease  
66 information.

## 67 RESULTS

68 The transgenic mice expressing human APP/PSEN1-Tg carrying familial AD mutations  
69 used in these studies (B6C3-Tg) have an onset of plaque pathology at around 6 months, which is  
70 followed by cognitive impairments with both increasing by 12-15 months of age. To explore  
71 behavioural alterations in these mice, we used a range of well-established experimental paradigms  
72 at 3 months (before the onset of pathology) and 6 months (at onset). Then, we evaluated the

73 differentially expressed genes and pathways in PFC, striatum, hippocampus and amygdala at both  
74 ages.

#### 75 *Anxiety-related behaviour in APP/PSEN1-Tg mice*

76 To evaluate if APP/PSEN1-Tg animals experience anxiety-like behaviour, 3 and 6-  
77 month-old APP/PSEN1-Tg were subjected to the elevated plus maze (EPM). The APP/PSEN1-  
78 Tg transgenic mice spent lower percentage of time in open arms than Non-Transgenic at both 3  
79 ( $t_{30}=2.30$ ,  $p=0.0286$ ; Figure 1A) and 6 months old ( $t_{26}=2.419$ ,  $p=0.0229$ ; Figure 1D), whereas no  
80 differences were found in the total number of arm entries ( $t_{30}=0.65$ ,  $p=0.520$ , Figure 1B and  
81  $t_{26}=1.21$ ,  $p=0.236$ , Figure 1E), indicating that APP/PSEN1-Tg animals displayed higher level of  
82 anxiety-like behaviours without locomotor impairments.

#### 83 *Early onset of despair-like behaviour in APP/PSEN1-Tg mutant mice*

84 Stress induced immobility is a despair responsive phenotype often used as a proxy for  
85 mood state in rodent models. To evaluate this response, we performed the tail suspension (TST)  
86 in APP/PSEN1-Tg transgenic and control mice.

87 At 3 months old, the analysis of the TST results using an ANOVA for repeated  
88 measurements revealed *stress* ( $F_{1,30}=20.77$ ,  $p<0.001$ ), *genotype* ( $F_{1,30}=5.27$ ,  $p=0.029$ ) and  
89 *stress* × *genotype* ( $F_{1,30}=8.61$ ,  $p=0.006$ ; Figure 1 C) effects. After Bonferroni's correction, results  
90 showed that transgenic mice presented higher stress-induced immobility ( $p<0.001$ ) in comparison  
91 with the pre-stress condition. Stress only increased the percentage of the immobility in  
92 APP/PSEN1-Tg mutants in comparison with Non-Transgenic animals ( $p=0.005$ ).

93 At 6 months, the ANOVA for repeated measurements showed *stress* ( $F_{1,24}=31.33$ ,  
94  $p<0.001$ ) and *genotype* ( $F_{1,24}=4.62$ ,  $p=0.042$ ; Figure 1F) effects. These results indicate that  
95 transgenic mice spent a higher percentage of immobility time and after repeated stress, but also  
96 this behaviour increases in both groups of mice.

#### 97 *Early-adulthood long-term memory impairments in APP/PSEN1-Tg mice*

98 Loss of memory is affected early during the time-course of the AD, being one of the most  
99 recognizable symptoms of the disease<sup>17</sup>. For this reason, we assessed the short- and long-term  
100 recognition memory in 3- and 6-month-old APP/PSEN1-Tg mice using the novel object  
101 recognition test.

102 At 3 months old, a two-way ANOVA showed a *genotype* ( $F_{1,29}=8.30$ ,  $p=0.007$ ), and  
103 *object* effect ( $F_{1,29}=36.93$ ,  $p=0.001$ ; Figure 2A). The *genotype* effect indicates that control animals  
104 had greater discrimination index than APP/PSEN1-Tg group.

105 At 6 months, a two-way ANOVA revealed a main effect of *genotype* ( $F_{1,24}=22.44$ ,  
106  $p<0.001$ ), an *object* effect ( $F_{1,24}=6.51$ ,  $p=0.018$ ) and *object*  $\times$  *genotype* interaction ( $F_{1,24}=14.64$ ,  
107  $p=0.001$ ; Figure 2D). The *genotype* effect shows that control animals had greater discrimination  
108 index than transgenic mice. The *post-hoc* Bonferroni's analysis showed that Non-Transgenic  
109 mice could discriminate both the novel object 1 and 2 in the same manner ( $p=0.394$ ), whereas  
110 APP/PSEN1-Tg animals could only discriminate novel object 1, having a greater discrimination  
111 index for the novel object 1 than novel object 2 ( $p<0.001$ ). Non-Transgenic animals had higher  
112 discrimination index than APP/PSEN1 when they are exposed to novel object 2 ( $p<0.001$ ). In fact,  
113 APP/PSEN1-Tg animals could not discriminate between familiar and novel object 2, indicating  
114 important memory impairments.

#### 115 *Early poor left-right discrimination learning of APP/PSEN1-Tg mice*

116 In order to evaluate working memory and attention deficits present in AD<sup>18</sup>, we performed  
117 a left-right discrimination learning paradigm in 3 and 6 month APP/PSEN1-Tg transgenic and  
118 Non-Transgenic mice using the T-maze.

119 The two-way ANOVA showed a *trial* effect ( $F_{9,270}=2.152$ ,  $p=0.026$ ) and *trial*  $\times$  *genotype*  
120 ( $F_{9,270}=2.023$ ,  $p=0.037$ ; Figure 2B) at 3 months old. The *post-hoc* analysis revealed that  
121 APP/PSEN1-Tg animals took more time to reach the platform than control animals on trial 1  
122 ( $p=0.044$ ) and trial 5 ( $p=0.027$ ) during the acquisition learning. However, this analysis suggests  
123 that control mice spent more time to reach the platform during the trial 2 of the reversal-learning  
124 phase ( $p=0.02$ ) than transgenic mice. The pair-wise comparison showed that APP/PSEN1-Tg  
125 reduced the time to escape on acquisition trial 2 ( $p=0.037$ ) and trial 2 of the reversal learning  
126 ( $p=0.017$ ) in comparison with the trial 1 of the acquisition. We found that APP/PSEN1-Tg  
127 animals spent more trials than Non-Transgenic animals ( $t_{30}=2.35$ ,  $p=0.026$ ; Figure 2C) to reach  
128 the acquisition criterion. Nevertheless, both groups spent a similar number of trials to reach the  
129 criteria during reversal learning ( $p=0.443$ ).

130 At 6 months old, the ANOVA revealed a *trial* ( $F_{9,216}=3.84$ ,  $p<0.001$ ) and *genotype*  
131 ( $F_{1,24}=6.53$ ,  $p=0.017$ , Figure 2E) effects, suggesting that APP/PSEN1-Tg mutant mice showed  
132 longer latencies to reach the platform than control animals during acquisition and reversal  
133 learning phases. The mean latency to get the acquisition criteria showed a trend to be statistically

134 different in the number of trials that APP/PSEN1-Tg in comparison with control mice ( $t_{24}=1.91$ ;  
135  $p=0.068$ ; Figure 2F).

### 136 *Hyposmia in APP/PSEN1-Tg mice at 6 months old*

137 Since olfactory impairment is present in up to 90% of AD patients<sup>19</sup>, we assessed the  
138 olfactory function in transgenic and control mice (Figure 3A and C).

139 At 3 months old, both experimental groups could discriminate between the first water  
140 presentation and limonene odour (Wilcoxon test, Non-Transgenic group,  $p=0.05$  and  
141 APP/PSEN1-Tg,  $p=0.01$ ; Figure 3A).

142 At 6 months, both APP/PSEN1-Tg transgenic mice and Non-Transgenic mice could  
143 discriminate between the first water presentation and limonene (Wilcoxon test, Non-Transgenic,  
144  $p=0.006$ , and APP/PSEN1-Tg,  $p=0.008$ ; Figure 3C). Additionally, APP/PSEN1-Tg mutant mice  
145 showed a higher investigation time during the fifth water presentation than control group  
146 (Kruskal-Wallis test,  $\chi^2=3.84$ ,  $p=0.05$ ; Figure 3C). Whereas both experimental groups spent the  
147 same time investigating the cotton swab at 3 months old ( $t_{22}=0.66$ ,  $p=0.52$ ; Figure 3B),  
148 APP/PSEN1-Tg mutant increased the investigation time than Non-Transgenic control animals,  
149 showing an indiscriminate investigation at 6 months-old ( $t_{21}=2.52$ ,  $p=0.02$ ; Figure 3D),  
150 independently of the type of odour presented.

### 151 *DE analysis in PFC, striatum, hippocampus and amygdala at two different ages*

152 We performed gene expression analysis in regions of the brain known to be loci for these  
153 functions. We compared the transcriptome signature of APP/PSEN1-Tg transgenic and control  
154 mice at 3 and 6 months old, to determine the significant differentially expressed (DE) genes with  
155 a cut-off  $|\logFC| < 0.585$ , adjusted  $p < 0.05$ , deregulated in the brain areas of interest (Figure 4;  
156 Supplementary Tables 2-5).

157 Among the dysregulated genes in PFC of younger APP/PSEN1-Tg mice, we found 5  
158 corresponding to the so-called canonical clock genes: *Ciart*, *Dbp*, *Bhle41* and *Nr1d1* were  
159 downregulated, and *Nfil3* was upregulated, together with other genes, such as *App*, *Prpn*, *Inhba*,  
160 and *Fosl2* (Figure 4A; Supplementary Table 2). At 6 months-old mice, *Dbp* and *Nr1d1* remained  
161 downregulated in this area, whereas *App*, *Prnp* were also upregulated together with *Itgax* and  
162 *Maml3* (Figure 4B; Supplementary Table 2).

163 In the striatum of 3-months-old mice, we only found the downregulation of *Ciart*, and the  
164 overexpression of *App*, *Prpn* and *Edn1* (Figure 4C; Supplementary Table 3). By contrast, the

165 deregulation of older mice in the striatum was restricted to only one downregulated transcript,  
166 *RP23-152P11.2*, whilst *App* and *Prpn* remained upregulated (Figure 4D; Supplementary Table  
167 3).

168 In the hippocampus of 3-months-old APP/PSEN1-Tg mice, 8 genes were downregulated,  
169 including *Ptx4* and *Mc4r* and *Zap70*. Among the upregulated genes, we found *Plch1*, *Cdh23*,  
170 *Itga10*, *App*, *Prnp*, and *Inhba* (Figure 4E; Supplementary Table 4). At 6 months, the analysis  
171 revealed that only *App* and *Prnp* remained upregulated (Figure 4F; Supplementary Table 4).

172 Interestingly, the amygdala of young transgenic mice was the most affected structure.  
173 More than 100 genes were upregulated in the amygdala of the 3-month-old AD mice (Figure 5A;  
174 Supplementary Table 5), including *Tnfrsf8l3*, *Sstr1*, *Sstr4*, *Chrm5* and *Aldh1a3* (Figure 4G;  
175 Figure 5A and C). Among the almost 100 downregulated genes in the amygdala at 3 months old  
176 (Figure 4G; Supplementary Table 5), we found *Grin3b*, *Chrna10* and *Ciart*. However, when we  
177 analysed the number of deregulated genes at 6 months old, both the upregulated and  
178 downregulated genes dramatically decreased in all brain areas (Figure 4H, Figure 5B). In  
179 amygdala, the upregulation of genes diminished to three genes, *App*, *Prnp* and *Clec7a* (Figure  
180 4H, Figure 5B, D) while the downregulated genes were restricted to *Dbp* and *Ciart* (Figure 4H;  
181 Figure 5C, H).

182 When we compared those genes that were consistently deregulated at both ages per area,  
183 we observed that the upregulation of *App* and *Prnp* were extended throughout PFC, hippocampus  
184 and amygdala (Figure 4A,E,G; Figure 5E). Moreover, this upregulation at 6 months-old was  
185 affecting all brain regions Figure 4B,D,F and H; Figure 5E). By contrast, *Ciart* was  
186 downregulated in PFC, striatum, and amygdala of APP/PSEN1-Tg mice at 3 months old. Only  
187 *Nr1d1*, *Dbp* in PFC and *Dbp* and *Ciart* in amygdala were downregulated in the older transgenic  
188 mice (Figure 4B,H; Figure 5H).

### 189 *Enriched gene sets at 3 and 6 months-old*

190 We then performed bioinformatic analyses to determine pathways altered in the  
191 transgenic mice in the pre-disease and early pathology periods (3 months and 6 months). This  
192 functional analysis showed enriched gene sets related to depressive disorders appear at 3 month-  
193 old within PFC, hippocampus and amygdala, areas that are intimately involved in both cognitive  
194 function and mood regulation (Figure 6A,B,D and E; Supplementary Table 6). In the striatum,  
195 we only identified two positively enriched gene sets - those of circadian rhythms and Alzheimer's  
196 disease (Figure 6C) - that also appear in PFC, hippocampus and amygdala at early stages. In the  
197 6 months-old animals, however, the number of gene sets that were significantly enriched in

198 APP/PSEN1-Tg transgenic mice was higher. We identified additional negatively enriched  
199 pathways linked to the electron transport chain, found in the PFC, striatum and hippocampus  
200 (Figure 6F, G and H; Supplementary Table 7) and also pathways implicated in AD and  
201 neuroinflammation. In parallel, the positively enriched depressive-related gene sets not only  
202 increased in number but also the dysregulation of these pathways extended to all the brain  
203 structures analysed (Figure 6F-I) at this later age. Additionally, the neurotransmission-related  
204 pathways were more enriched in 6-month-old transgenic mice than at early ages, suggesting that  
205 neurodegeneration increased the number of affected gene sets. By contrast, the impairments in  
206 circadian rhythms seem to appear in the preclinical phase in the amygdala (Figure 6B-E),  
207 persisting at least to the period when pathology becomes apparent (Figure 6I).

208 We then extended these findings to human data by performing GSEA analysis using  
209 DisGeNET (version v7.0; <http://www.disgenet.org/>) gene sets (Supplementary Figure 3;  
210 Supplementary Tables 8 and 9). DisGeNET is a knowledge resource that collects information  
211 about the genetic underpinnings of human diseases. This GSEA, which is specific for diseases  
212 and disease-related phenotypes, showed positively enriched gene sets corresponding to several  
213 subtypes of AD and dementias in the PFC and hippocampus of 3-month-old animals.  
214 Additionally, we found positively enriched gene sets associated with memory impairment  
215 phenotypes, anxiety disorders, traits and symptoms related to motor impairment, and to  
216 neurodegenerative diseases in the hippocampus of younger animals. These results are consistent  
217 with the deregulated pathways shown in Figure 6 and with the results of the behavioral tests. In  
218 6-month-old animals, the DisGeNET GSEA showed that positively enriched gene sets of several  
219 subtypes of AD and dementias and those related to memory impairment were extended to all brain  
220 areas. This dysregulation of processes related to memory impairment in old animals is consistent  
221 with the working memory deficits and learning impairments that displayed 6-month-old animals  
222 displayed in the behavioural experiments. Moreover, positively enriched gene sets related to  
223 diseases of the central nervous system were observed in the hippocampus and striatum of 6-  
224 month-old animals. Most of these diseases are cerebrovascular diseases, which have been related  
225 to MD<sup>20</sup>. The connection between this class of disorders and MD have been suggested to be  
226 mediated by inflammation<sup>21</sup>, which is consistent with the dysregulation of neuroinflammation  
227 pathways found in hippocampus of young and old animals (Figure 6A,D,H).

## 228 DISCUSSION

229 This study provides the first evidence of early, pre-pathological, depression-like  
230 symptoms, as well as cognitive impairment, and the underpinning transcriptomic changes  
231 specifically in PFC, striatum, hippocampus and amygdala in a rodent AD model (B6C3-Tg



232 (APP<sup>swe</sup>, PSEN1<sup>dD9</sup>)85Dbo/MmJax). In particular, APP/PSEN1-Tg transgenic mice show both  
233 pre-pathological and peri-pathological deficits in different behaviours. On the one hand, the  
234 anxiety-related behaviours and despair behaviours after stressful conditions, hyperlocomotion  
235 and diminishing discrimination begins, in the model used, at 3 months of age, before the onset of  
236 pathology. On the other hand, the hyposmia traits, working memory deficits and reversal learning  
237 impairments appear later at 6 months old, at the time when amyloid plaque pathology begins to  
238 become apparent.

239 The behavioural experiments indicate that APP/PSEN1-Tg mice showed early anxiety-  
240 like and depressive-like traits, symptoms which would be expected to be associated with  
241 dysfunction of the amygdaloid, hippocampal and PFC circuitries. Supporting these observations,  
242 the genes *Nr1d1* and *Bhlhe41*, which have been previously associated with both control of  
243 circadian rhythms function and with depression<sup>22,23</sup>, were downregulated in the PFC of transgenic  
244 mice. Moreover, *Plchl* is upregulated at 3 months old in the transgenic mice. The product of this  
245 gene is part of the pathway generating second messengers, such as inositol 1,4,5-triphosphate and  
246 diacylglycerol; a pathway which is intimately linked to the depressive-like phenotype<sup>24</sup>. At 3 but  
247 not at 6 months old, we found the upregulation of *Inhba* in PFC and hippocampus, which could  
248 represent a compensatory change to mitigate the depressive-like behaviour. In fact, the activin  
249 signalling pathway plays a key role in the response to antidepressant treatment in humans<sup>25</sup>. *Nr1d1*  
250 remains downregulated at 6 months old, without changes in *Inhba* signalling, due to possible  
251 deeper detrimental effects at older ages, e.g. deficits in working memory. Additionally, *Mc4r* is  
252 downregulated in hippocampus at 3 months old and facilitates anxiety-like and depression-like  
253 behaviours pursuant to chronic stress<sup>26</sup>. Indeed, a general overexpression of *Prnp* and *App* in 3-  
254 and 6-month-old APP/PSEN1-Tg mutant mice could also contribute to this depressive-like  
255 symptomatology, since previous studies found alterations of these protein levels in cortical areas  
256 and peripheral blood of MD<sup>27,28</sup>. Noteworthy, this mouse overexpresses APP695 containing the  
257 double Swedish mutation, so the general upregulation of *App* found in all brain areas of interest  
258 is directly induced by the model. Moreover, *Prnp* may modulate depressive-like behaviour in  
259 mice via interactions with monoaminergic neurotransmission<sup>29</sup>. In accordance with these results,  
260 we observed an increasing number of enriched pathways linked to depressive disorders (including  
261 depression, apathy and anxiety, among others) and disease-associated gene sets at 3 and 6 months  
262 old, before the period of formation of  $\beta$ -amyloid plaques in this model<sup>30</sup>. These results therefore  
263 support the notion that depressive symptoms are part of the prodromal phase of the AD in this  
264 rodent model, just as they are hypothesised to be in human disease.

265 Overall, the APP/PSEN1-Tg mutant mice had a general decline in memory with ageing,  
266 as previously described in AD models<sup>15,31</sup> but these phenomenon was demonstrated before the

267 onset of pathology, although became more extensive at about the time pathology was expected.  
268 Despite a subtle imbalance of memory impairment pathways at 3 months old, transgenic mice  
269 showed higher latencies to acquire the criterion in the left-right discrimination test. These memory  
270 deficits could be promoted by the observed dysregulation of *Cdh23*, *Ptx4* and *Mc4r* genes in  
271 hippocampus, as they are known to participate in the endocytosis of glutamatergic ionotropic  
272 AMPA receptors, hippocampal synaptic plasticity and mood-like disorders in mice,  
273 respectively<sup>32-35</sup>. At 6 months old, APP/PSEN1-Tg mutant mice show deeper deficits in memory  
274 in all the evaluated tasks. They display longer latencies in left-right discrimination task, and  
275 deficits in working and long-term memories. These memory impairments run in parallel with an  
276 increasing number enriched pathways in PFC and hippocampus (abnormal long-term spatial  
277 reference and spatial memories, among others), involved in working<sup>36,37</sup> and spatial learning<sup>38,39</sup>,  
278 respectively, and with dysregulation of gene sets related to memory impairment and learning  
279 disabilities (Supplementary Figure 3).

280 Our results show that the APP/PSEN1-Tg, at 3 months old mice spent the same time than  
281 the control mice investigating the cotton-swabs, which have been impregnated with limonene.  
282 However, at 6 months old the exploration of both odours was increased in transgenic mice  
283 compared to the control group, independently whether water and limonene were presented.  
284 Overall, APP/PSEN1-Tg animals seem not to present a complete anosmia, although it seems that  
285 they display a loss of discrimination between odours, so this possible hyposmia together with  
286 working memory<sup>36,37</sup> impairments could explain the indiscriminate investigation that transgenic  
287 mice display. These olfactory alterations could be due to pathology in the olfactory bulb at 6  
288 months-old<sup>40</sup>, that might be promoting changes in the sense of smell of APP/PSEN1-Tg mice.  
289 Thus, our mice model could reflect the progressive anosmia that AD patients show at early stages  
290 of the disease<sup>19</sup>. Indeed, a recent study shows that late-depression patients show similar olfactory  
291 impairments that those in AD<sup>41</sup>. In this sense, early olfactory deficits could lead to the  
292 identification of depression patients with high risk of developing AD<sup>41</sup>, as also occurs in our  
293 APP/PSEN1-Tg animals by showing early depression-like behaviour with later hyposmia traits.

294 MD and AD are both associated with neuroinflammation and oxidative stress<sup>11</sup> and  
295 evidence for the activation of both processes was observed in the differential expression analysis.  
296 This show a dysregulation of inflammatory-related response genes, such as *Maml3*, *Zap70*, *Itgax*  
297 and *App*<sup>42-45</sup> at both ages in APP/PSEN1-Tg mice. In addition, gene sets related to electron  
298 transport chain are, in general, downregulated in APP/PSEN1-Tg animals at 6 months in PFC,  
299 striatum and hippocampus, reflecting a possible abnormal function of mitochondrial metabolism,  
300 as previously observed in AD<sup>46</sup> and MD<sup>47</sup>.

301 One of the most striking observations is that majority of the negatively enriched gene sets  
302 are associated with control of circadian rhythms, and these are observed in all brain areas of  
303 interest (Figure 6B). In particular, we observe the downregulation of *Ciart* and *Dbp* in amygdala,  
304 striatum and PFC at 3 and 6 months old (Figure 5 for more details). The expression of both genes  
305 in anterior cingulate cortex modulates the circadian rhythms and mood<sup>23,48</sup>, through the  
306 MERK/ERK signalling pathway. Although disturbances in the circadian rhythms are associated  
307 with both MD and AD<sup>49</sup>, this is the first study in which both circadian transcripts are linked to  
308 AD. A close relationship has been found between *Dbp* and AD, given that TGF- $\beta$ 2, present in the  
309 cerebrospinal fluid of AD patients, inhibits the expression of some clock genes, including *Dbp*,  
310 in *in vitro* assays. We also note that the predominant tau-kinase, reported to be downstream of  $\beta$ -  
311 amyloid production<sup>50-52</sup>, GSK3 $\beta$ , is a regulator of Per2 phosphorylation and hence a master-  
312 regulator of the mammalian clock<sup>53</sup>. Our results suggest that there is a decline in the functional  
313 control of circadian rhythms in APP/PSEN1-Tg mice that should be further studied in detail.

314 In summary, we suggest that MD could be an indicator of the early onset of AD. The  
315 APP/PSEN1-Tg model of AD could recreate the early-depressive symptoms before developing  
316 AD, as a prodromal stage of the neurodegenerative disease. In fact, this model provides *App*,  
317 *Prnp*, *Ciart* and *Dbp* as possible shared biomarkers of AD and MD, despite the implications of  
318 *App* and *Prnp* in MD remaining unclear<sup>54-56</sup>. In this sense, further studies combining post-mortem  
319 human tissues of PFC, striatum, hippocampus and amygdala from AD patients with and without  
320 an early history of depression, and transcriptomic analysis could help to provide additional  
321 evidence on the combined biological signature of both diseases.

## 322 MATERIAL AND METHODS

323 See Supplementary material and methods for additional details.

### 324 *Animals and rearing conditions*

325 For the present study, we used 30 hemizygous double transgenic male mice (B6C3-Tg  
326 (APP<sup>swe</sup>, PSEN1<sup>dD9</sup>)85Dbo/MmJax) model of AD (APP/PSEN1-Tg) and 30 male Non-  
327 Transgenic control mice (004462, The Jackson Laboratory, USA). These transgenic mice express  
328 a chimeric mouse/human APP (Mo/HuAPP695<sup>swe</sup>) and a mutant human presenilin-1 (PS1-dD9),  
329 each controlled by independent mouse prion protein promoter elements<sup>30</sup>. The mice were  
330 assigned to two different groups: APP/PSEN1-Tg and Non-Transgenic (n=16 per group) at 3  
331 months-old, and APP/PSEN1-Tg and Non-Transgenic (n=14 per group) at 6 month-old, before  
332 developing the  $\beta$ -amyloid plaques and right at onset<sup>30</sup>. All procedures were conducted in  
333 accordance with national (BOE-2013-1337) and EU (Directive 2010-63EU) guidelines regulating  
334 animal research and were approved by the local ethics committee (CEEA-PRBB).

335 *Behavioural Evaluation*

336 *Elevated plus maze (EPM)* (Panlab s.l.u, Barcelona, Spain) was performed using a black maze  
337 elevated 30 cm above the ground<sup>57</sup>. Each mouse was placed in the centre of the maze, and was  
338 allowed to freely explore for 5 min. The software SMART (Panlab s.l.u., Spain) automatically  
339 recorded the number of entries and the time spent in the arms.

340 *Novel object recognition (NOR)*. Single trial NOR was performed in an open black arena (32 ×  
341 28 cm) using 3 object types at opposite corners of the open field, 50 mm from the walls, similar  
342 to those previously described<sup>58</sup>. Object exploration was defined as intentional contact between  
343 the mouse's nose and the objects. The recognition index was defined as  $[t_{\text{Novel}} / (t_{\text{Novel}} + t_{\text{Familiar}})] \times$   
344 100 for animals exploring novel objects in the acquisition trial.

345 *Left-right discrimination learning*. This test was performed using a T-maze apparatus, as  
346 previously described<sup>31</sup>. This T-maze was filled with water (23 ± 1 °C). During the first two trials,  
347 two identical platforms were submerged on the end of both arms to test possible side preferences.  
348 A mouse was considered to have achieved criterion after 5 consecutive errorless trials. The  
349 reversal-learning phase was then conducted 48h later, applying the same protocol except that mice  
350 were trained to reach the escape platform of the opposite arm. Escape latencies and number of  
351 trials to reach the criterion were manually recorded. A maximum of 20 trials were needed to  
352 complete the experiment.

353 *Tail suspension test (TST)*. Each mouse was suspended individually 50 cm above a bench top for  
354 6 min<sup>57</sup>. Mice were individually video-recorded and an observer, blind to the experimental  
355 conditions, evaluated the percentage of time the animal was immobile during the test.

356 *Exposure to stress*. The stressful procedure consisted in the exposition to two mild stressful  
357 situations each day during four consecutive days: animals were placed for 10 min in the open  
358 field apparatus, and then they were placed in glass cylinders filled with water during 6 min.  
359 Animals were subsequently evaluated for TST.

360 *Habituation-dishabituation test*. The test was performed as described<sup>59</sup>. After five minutes of  
361 habituation to the cage, six consecutive one-minute presentations of a cotton swab with distilled  
362 water were followed by one presentation of limonene (Sigma-Aldrich) solution 1:1000 in distilled  
363 water. After that, five consecutive one-minute applications of distilled water were presented.  
364 Tests were video-recorded and a blinded observer measured the time that mice spent sniffing the  
365 cotton tip rearing on its hind limbs.

366 *Animal sacrifice and sample preparation for RNA extraction*

367 After behavioural analysis, animals were sacrificed by cervical dislocation and brains were  
368 immediately removed from the skull. Brain samples were dissected at both ages: 3 and 6 months  
369 old from Non-Transgenic and APP/PSEN1-Tg mice (n=6 per group). PFC (Figure 4I), striatum,  
370 amygdala and hippocampus were dissected following an anatomical atlas<sup>60</sup>. Brain samples were  
371 immediately stored at -80°C until the RNA extraction. Then, each tissue sample was homogenized  
372 in 1ml of QIAzol Lysis Reagent using a rotor–stator homogenizer (Polytron PT 2500 E;  
373 Kinematica AG, Switzerland) during 20–40 seconds. After homogenization, the RNA was  
374 extracted using RNeasy Lipid Tissue Mini Kit (Qiagen)<sup>61</sup>.

### 375 *RNA sequencing*

#### 376 *Library preparation and sequencing*

377 RNA samples (50-100 ng) with RIN scores from 7.6 to 9 (Agilent 4200 TapeStation)  
378 were reverse transcribed to cDNA. Poly-A tail selection was done using Total Dual RNA-  
379 Seq PolyA. cDNA was sequenced (HiSeq3000/4000) at the Oxford Wellcome Trust facility  
380 obtaining 75 bp per read. On average, 33M reads were obtained per sample and a mapping rate  
381 of ~85%.

#### 382 *RNAseq DE analysis*

383 Raw sequencing reads in the 1710 paired fastq files were mapped with STAR version  
384 2.5.3a<sup>62</sup> to the Gencode release 17 based on the GRCm38.p6 reference genome and using the  
385 corresponding GTF file. The 885 bam files corresponding to 9 different lanes were merged for  
386 each sample using Samtools 1.5, ending up with 95 bam files. The table of read counts was  
387 obtained with featureCounts tool in subread package, version 1.5.1.

388 Further analyses were performed in R, version 3.4.3. Genes having less than 10 counts in  
389 at least 10 samples were excluded from the analysis. Raw library size differences between  
390 samples were treated with the weighted “trimmed mean method” TMM<sup>63</sup> implemented in the  
391 edgeR package<sup>64</sup>. These normalized counts were used in order to make the unsupervised analysis,  
392 heatmaps and clusters. For the differential expression (DE) analysis, read counts were converted  
393 to log<sub>2</sub>-counts-per-million (logCPM), the mean-variance relationship was modelled with  
394 precision weights using the voom approach and linear models were subsequently applied with  
395 limma package, version 3.30.13<sup>65</sup>. p-values (p) were adjusted for multiple comparisons using the  
396 Benjamini-Hochberg false discovery rate (FDR) approach. Genes were considered to be  
397 differentially expressed if  $|\log_2FC| > 0.585$  and adjusted  $p < 0.05$ .

#### 398 *qPCR validation*

399 Data were obtained from the qPCR platform using Taqman Low Density array (TLDA;  
400 qPCR 7900HT, Life Technologies), where thirteen genes of interest were studied together with  
401 the following endogenous controls: *Gapdh*, *Tbp* and *I8S*. The gene *I8S* was used to check overall  
402 expression whereas *Gapdh* and *Tbp* were geometric averaged and included in posterior analyses  
403 as the  $C_i(\text{endogenous})$ . For each gene,  $DC_i$  was computed, comparing these values between  
404 conditions.  $DC_i = C_i(\text{gene}) - C_i(\text{endogenous})$ . Comparisons between studied conditions were  
405 performed using a t-Student's t-test. Results were adjusted for multiple comparisons using the  
406 FDR. The comparisons performed in each area are APP/PSEN1-Tg and Non-Transgenic at both  
407 ages (validated genes in Supplementary Table 1).

#### 408 *Functional and Pathway analysis*

409 Pre-ranked GSEA was used in order to retrieve enriched gene sets corresponding to functional  
410 pathways<sup>66</sup>. The list of genes was ranked using the  $-\log(\text{p.val}) * \text{signFC}$  value for each gene from  
411 the statistics obtained in the DE analysis with limma.

412 For the gene set collection we used a database described previously<sup>67</sup> and available in  
413 <http://ge-lab.org/gs/>. The gene sets in this database are harvested from different pathway data  
414 sources and published studies all related to mice.

415 MGI genes IDs were converted to mouse symbol ID using the annotation files in  
416 (<http://www.informatics.jax.org/>). As there were a high number of redundant gene sets in the  
417 collection, a filtering strategy was applied to select the most representative ones. The filtering  
418 steps were: i) pairwise Jaccard coefficients were computed between the gene sets from the  
419 following data sources: Published articles, MPO, HPO, Reactome, MsigDB, GO\_BP, KEGG,  
420 PID, WikiPathways, INOH, PANTHER, NetPath, Biocarta, EHMN, MouseCyc and HumanCyc;  
421 ii) for gene sets with a Jaccard = 1 (gene sets constituted by the same genes), only one was  
422 considered, and iii) from gene sets with a Jaccard > 0.8, the gene set with the highest number of  
423 genes was considered and the other gene sets were excluded from the gene set collection.

#### 424 *DisGeNET database analysis*

425 We performed a GSEA to retrieve enriched gene sets associated with human diseases.  
426 For this, we ranked the genes using the  $-\log(\text{p.val}) * \text{signFC}$  value from the DE analysis. The gene  
427 sets associated with human diseases, symptoms, and traits were retrieved from the DisGeNET  
428 database (<https://www.disgenet.org/>, v7)<sup>68</sup>. DisGeNET integrates gene-disease associations  
429 collected from curated repositories, from genome-wide association studies (GWAS) catalogues,  
430 from animal models, and data obtained from the scientific literature using text mining  
431 approaches<sup>68</sup>. For this analysis, we used only the curated gene sets in DisGeNET, that include  
432 information from repositories such as UniProt, PsyGeNET, Clingen, and the Genomics England

433 Panel app. The mouse genes were converted to human gene IDs using the annotation files in  
434 (<http://www.informatics.jax.org/>).

#### 435 **STATISTICAL ANALYSIS**

436 For animal model experiments, analysis was performed using software SPSS 23.0 (SPSS  
437 Inc., USA). Statistical differences were investigated by Student's t-test and ANOVA with  
438 repeated measurement analysis. *Post-hoc* analysis was calculated with Bonferroni's correction  
439 when applicable. Since habituation-dishabituation data were not normally distributed, Wilcoxon  
440 matched-pairs rank test and Kruskal-Wallis test were calculated. Fisher's exact test was used to  
441 evaluate differences in the percentage of animals that made an error in the Y-maze. For the GSEA  
442 we only included those gene sets with a FDR  $q$  value  $< 0.05$  and  $|NES| > 1.4$ .

#### 443 **DATA AVAILABILITY**

444 The data that support the findings of this study are available from the corresponding author  
445 upon reasonable request.

446

447

448    **REFERENCES**

- 449    1.    World Health Organization. *Depression and Other Common Mental Disorders*. (2017).
- 450    2.    Alexopoulos, G. S. *et al.* Executive dysfunction and long-term outcomes of geriatric  
451    depression. *Arch. Gen. Psychiatry* **57**, 285–290 (2000).
- 452    3.    Potter, G. G., Kittinger, J. D., Wagner, H. R., Steffens, D. C. & Krishnan, K. R. R.  
453    Prefrontal neuropsychological predictors of treatment remission in late-life depression.  
454    *Neuropsychopharmacology* **29**, 2266–2271 (2004).
- 455    4.    Ownby, R. L., Crocco, E., Acevedo, A., John, V. & Loewenstein, D. Depression and risk  
456    for Alzheimer disease: systematic review, meta-analysis, and metaregression analysis.  
457    *Arch. Gen. Psychiatry* **63**, 530–8 (2006).
- 458    5.    Kaup, A. R. *et al.* Trajectories of Depressive Symptoms in Older Adults and Risk of  
459    Dementia. *JAMA psychiatry* **73**, 525–31 (2016).
- 460    6.    Holmquist, S., Nordström, A. & Nordström, P. The association of depression with  
461    subsequent dementia diagnosis: A Swedish nationwide cohort study from 1964 to 2016.  
462    *PLOS Med.* **17**, e1003016 (2020).
- 463    7.    van der Linde, R. M. *et al.* Longitudinal course of behavioural and psychological  
464    symptoms of dementia: systematic review. *Br. J. Psychiatry* **209**, 366–377 (2016).
- 465    8.    Dorey, J. M. *et al.* Behavioral and psychological symptoms of dementia and bipolar  
466    spectrum disorders: Review of the evidence of a relationship and treatment implications.  
467    *CNS Spectrums* **13**, 796–803 (2008).
- 468    9.    Dowlati, Y. *et al.* A Meta-Analysis of Cytokines in Major Depression. *Biol. Psychiatry*  
469    **67**, 446–457 (2010).
- 470    10.    White, C. S., Lawrence, C. B., Brough, D. & Rivers-Auty, J. Inflammasomes as  
471    therapeutic targets for Alzheimer’s disease. *Brain Pathol.* **27**, 223–234 (2017).
- 472    11.    Rodrigues, R., Petersen, R. B. & Perry, G. Parallels between major depressive disorder  
473    and Alzheimer’s disease: role of oxidative stress and genetic vulnerability. *Cell. Mol.*  
474    *Neurobiol.* **34**, 925–49 (2014).
- 475    12.    Song, W. *et al.* Alzheimer’s disease-associated TREM2 variants exhibit either decreased  
476    or increased ligand-dependent activation. *Alzheimer’s Dement.* **13**, 381–387 (2017).
- 477    13.    Pereira, A. C. *et al.* Age and Alzheimer’s disease gene expression profiles reversed by  
478    the glutamate modulator riluzole. *Mol. Psychiatry* **22**, 296–305 (2017).
- 479    14.    Klaassens, B. L., van Gerven, J. M. A., Klaassen, E. S., van der Grond, J. & Rombouts,  
480    S. A. R. B. Cholinergic and serotonergic modulation of resting state functional brain  
481    connectivity in Alzheimer’s disease. *Neuroimage* **199**, 143–152 (2019).
- 482    15.    Webster, S. J., Bachstetter, A. D., Nelson, P. T., Schmitt, F. A. & Van Eldik, L. J. Using  
483    mice to model Alzheimer’s dementia: an overview of the clinical disease and the  
484    preclinical behavioral changes in 10 mouse models. *Front. Genet.* **5**, (2014).



- 485 16. Du, Y. *et al.* MKP-1 reduces A $\beta$  generation and alleviates cognitive impairments in  
486 Alzheimer's disease models. *Signal Transduct. Target. Ther.* **4**, 58 (2019).
- 487 17. Langa, K. M. & Levine, D. A. The diagnosis and management of mild cognitive  
488 impairment: A clinical review. *JAMA - Journal of the American Medical Association*  
489 **312**, 2551–2561 (2014).
- 490 18. Correa, M. S. *et al.* Psychophysiological correlates of cognitive deficits in family  
491 caregivers of patients with Alzheimer Disease. *Neuroscience* **286**, 371–382 (2015).
- 492 19. Attems, J., Walker, L. & Jellinger, K. A. Olfactory bulb involvement in  
493 neurodegenerative diseases. *Acta Neuropathol.* **127**, 459–75 (2014).
- 494 20. Burrage, E., Marshall, K., Santanam, N. & Chantler, P. Cerebrovascular dysfunction  
495 with stress and depression. *Brain Circ.* **4**, 43 (2018).
- 496 21. Taylor, W. D., Aizenstein, H. J. & Alexopoulos, G. S. The vascular depression  
497 hypothesis: Mechanisms linking vascular disease with depression. *Molecular Psychiatry*  
498 **18**, 963–974 (2013).
- 499 22. Satyanarayanan, S. K. *et al.* Melatonergic agonist regulates circadian clock genes and  
500 peripheral inflammatory and neuroplasticity markers in patients with depression and  
501 anxiety. *Brain. Behav. Immun.* **85**, 142–151 (2020).
- 502 23. Li, J. Z. *et al.* Circadian patterns of gene expression in the human brain and disruption in  
503 major depressive disorder. *Proc. Natl. Acad. Sci. U. S. A.* **110**, 9950–9955 (2013).
- 504 24. Cao, X. *et al.* Astrocyte-derived ATP modulates depressive-like behaviors. *Nat. Med.* **19**,  
505 773–777 (2013).
- 506 25. Ganea, K. *et al.* Convergent animal and human evidence suggests the activin/inhibin  
507 pathway to be involved in antidepressant response. *Transl. Psychiatry* **2**, e177 (2012).
- 508 26. Chaki, S. & Okuyama, S. Involvement of melanocortin-4 receptor in anxiety and  
509 depression. *Peptides* **26**, 1952–1964 (2005).
- 510 27. Dean, B., Tsatsanis, A., Lam, L. Q., Scarr, E. & Duce, J. A. Changes in cortical protein  
511 markers of iron transport with gender, major depressive disorder and suicide. *World J.*  
512 *Biol. Psychiatry* 1–8 (2019). doi:10.1080/15622975.2018.1555377
- 513 28. Watanabe, S. *et al.* Biological tests for major depressive disorder that involve leukocyte  
514 gene expression assays. *J. Psychiatr. Res.* **66–67**, 1–6 (2015).
- 515 29. Beckman, D. *et al.* Prion protein modulates monoaminergic systems and depressive-like  
516 behavior in mice. *J. Biol. Chem.* **290**, 20488–20498 (2015).
- 517 30. Jankowsky, J. L. *et al.* APP processing and amyloid deposition in mice haplo-  
518 insufficient for presenilin 1. *Neurobiol. Aging* **25**, 885–892 (2004).
- 519 31. Filali, M., Lalonde, R. & Rivest, S. Cognitive and non-cognitive behaviors in an  
520 APPsw/PS1 bigenic model of Alzheimer's disease. *Genes, Brain Behav.* **8**, 143–148  
521 (2009).

- 522 32. Mills, F. *et al.* Cognitive flexibility and long-term depression (LTD) are impaired  
523 following  $\beta$ -catenin stabilization in vivo. *Proc. Natl. Acad. Sci. U. S. A.* **111**, 8631–6  
524 (2014).
- 525 33. Bjartmar, L. *et al.* Long-term treatment with antidepressants, but not environmental  
526 stimulation, induces expression of NP2 mRNA in hippocampus and medial habenula.  
527 *Brain Res.* **1328**, 25–33 (2010).
- 528 34. Shen, Y. *et al.* Stimulation of the Hippocampal POMC/MC4R Circuit Alleviates  
529 Synaptic Plasticity Impairment in an Alzheimer’s Disease Model. *Cell Rep.* **17**, 1819–  
530 1831 (2016).
- 531 35. Serova, L. I., Laukova, M., Alaluf, L. G. & Sabban, E. L. Blockage of melanocortin-4  
532 receptors by intranasal HS014 attenuates single prolonged stress-triggered changes in  
533 several brain regions. *J. Neurochem.* **131**, 825–835 (2014).
- 534 36. Goldman-Rakic, P. Cellular basis of working memory. *Neuron* **14**, 477–485 (1995).
- 535 37. Zhong, P. *et al.* Impaired Modulation of GABAergic Transmission by Muscarinic  
536 Receptors in a Mouse Transgenic Model of Alzheimer’s Disease. *J. Biol. Chem.* **278**,  
537 26888–26896 (2003).
- 538 38. Chapman, P. F. *et al.* Impaired synaptic plasticity and learning in aged amyloid  
539 precursor protein transgenic mice. *Nat. Neurosci.* **2**, 271–276 (1999).
- 540 39. Hsiao, K. *et al.* Correlative Memory Deficits, A $\beta$  Elevation, and Amyloid Plaques in  
541 Transgenic Mice. *Science (80-. ).* **274**, 99–103 (1996).
- 542 40. Finnie, G. S. *et al.* Characterization of an ‘Amyloid Only’ Transgenic (B6C3-  
543 Tg(APP<sup>swe</sup>,PSEN1<sup>dE9</sup>)85Dbo/Mmjax) Mouse Model of Alzheimer’s Disease. *J.*  
544 *Comp. Pathol.* **156**, 389–399 (2017).
- 545 41. Chen, B. *et al.* Cognitive Impairment and Structural Abnormalities in Late Life  
546 Depression with Olfactory Identification Impairment: an Alzheimer’s Disease-Like  
547 Pattern. *Int. J. Neuropsychopharmacol.* **21**, 640–648 (2018).
- 548 42. Barger, S. W. & Harmon, A. D. Microglial activation by Alzheimer amyloid precursor  
549 protein and modulation by apolipoprotein E. *Nature* **388**, 878–881 (1997).
- 550 43. Ho Kim, J. *et al.* Proteome-wide characterization of signalling interactions in the  
551 hippocampal CA4/DG subfield of patients with Alzheimer’s disease. *Sci. Rep.* **5**, 11138  
552 (2015).
- 553 44. Nanus, D. E. *et al.* Regulation of the Inflammatory Synovial Fibroblast Phenotype by  
554 Metastasis-Associated Lung Adenocarcinoma Transcript 1 Long Noncoding RNA in  
555 Obese Patients With Osteoarthritis. *Arthritis Rheumatol.* **72**, 609–619 (2020).
- 556 45. He, W., Yuan, T. & Maedler, K. Macrophage-associated pro-inflammatory state in  
557 human islets from obese individuals. *Nutr. Diabetes* **9**, 36 (2019).
- 558 46. Holper, L., Ben-Shachar, D. & Mann, J. Multivariate meta-analyses of mitochondrial  
559 complex I and IV in major depressive disorder, bipolar disorder, schizophrenia,  
560 Alzheimer disease, and Parkinson disease. *Neuropsychopharmacology* **44**, 837–849

- 561 (2019).
- 562 47. Czarny, P., Wigner, P., Galecki, P. & Sliwinski, T. The interplay between inflammation,  
563 oxidative stress, DNA damage, DNA repair and mitochondrial dysfunction in  
564 depression. *Progress in Neuro-Psychopharmacology and Biological Psychiatry* **80**, 309–  
565 321 (2018).
- 566 48. Orozco-Solis, R. *et al.* A Circadian Genomic Signature Common to Ketamine and Sleep  
567 Deprivation in the Anterior Cingulate Cortex. *Biol. Psychiatry* **82**, 351–360 (2017).
- 568 49. Irwin, M. R. Sleep and inflammation: partners in sickness and in health. *Nat. Rev.*  
569 *Immunol.* 1–14 (2019). doi:10.1038/s41577-019-0190-z
- 570 50. Takashima, A. *et al.* Presenilin 1 associates with glycogen synthase kinase-3 $\beta$  and its  
571 substrate tau. *Proc. Natl. Acad. Sci. U. S. A.* **95**, 9637–9641 (1998).
- 572 51. Lovestone, S. *et al.* Alzheimer’s disease-like phosphorylation of the microtubule-  
573 associated protein tau by glycogen synthase kinase-3 in transfected mammalian cells.  
574 *Curr. Biol.* **4**, 1077–1086 (1994).
- 575 52. Hooper, C., Killick, R. & Lovestone, S. The GSK3 hypothesis of Alzheimer’s disease.  
576 *Journal of Neurochemistry* **104**, 1433–1439 (2008).
- 577 53. Iitaka, C., Miyazaki, K., Akaike, T. & Ishida, N. A role for glycogen synthase kinase-3 $\beta$   
578 in the mammalian circadian clock. *J. Biol. Chem.* **280**, 29397–29402 (2005).
- 579 54. Inoue, M. *et al.* Serum Levels of Albumin– $\beta$ -Amyloid Complex in Patients with  
580 Depression. *Am. J. Geriatr. Psychiatry* **24**, 764–772 (2016).
- 581 55. Harrington, K. D., Lim, Y. Y., Gould, E. & Maruff, P. Amyloid-beta and depression in  
582 healthy older adults: A systematic review. *Australian and New Zealand Journal of*  
583 *Psychiatry* **49**, 36–46 (2015).
- 584 56. Watanabe, S. Y. *et al.* Biological tests for major depressive disorder that involve  
585 leukocyte gene expression assays. *J. Psychiatr. Res.* **66–67**, 1–6 (2015).
- 586 57. Gracia-Rubio, I. *et al.* Maternal separation induces neuroinflammation and long-lasting  
587 emotional alterations in mice. *Prog. Neuro-Psychopharmacology Biol. Psychiatry* **65**,  
588 104–117 (2016).
- 589 58. Montagud-Romero, S. *et al.* The novelty-seeking phenotype modulates the long-lasting  
590 effects of intermittent ethanol administration during adolescence. *PLoS One* **9**, e92576  
591 (2014).
- 592 59. Agustín-Pavón, C., Martínez-Ricós, J., Martínez-García, F. & Lanuza, E. Role of nitric  
593 oxide in pheromone-mediated intraspecific communication in mice. *Physiol. Behav.* **98**,  
594 608–13 (2009).
- 595 60. Paxinos, G. & Franklin, K. B. J. *The mouse brain in stereotaxic coordinates.* Academic  
596 Press **2nd**, (2004).
- 597 61. Lacinova, Z., Dolinkova, M., Haluzikova, D., Krajickova, J. & Haluzik, M. Comparison  
598 of manual and automatic (MagNA Pure) isolation methods of total RNA from adipose

- 599 tissue. *Mol. Biotechnol.* **38**, 195–201 (2008).
- 600 62. Dobin, A. *et al.* STAR: ultrafast universal RNA-seq aligner. *Bioinformatics* **29**, 15–21  
601 (2013).
- 602 63. Robinson, M. D. & Oshlack, A. A scaling normalization method for differential  
603 expression analysis of RNA-seq data. *Genome Biol.* **11**, R25 (2010).
- 604 64. Robinson, M. D., McCarthy, D. J. & Smyth, G. K. edgeR: a Bioconductor package for  
605 differential expression analysis of digital gene expression data. *Bioinformatics* **26**, 139–  
606 40 (2010).
- 607 65. Smyth, G. K. limma: Linear Models for Microarray Data. in *Bioinformatics and*  
608 *Computational Biology Solutions Using R and Bioconductor* 397–420 (Springer-Verlag,  
609 2005). doi:10.1007/0-387-29362-0\_23
- 610 66. Subramanian, A. *et al.* Gene set enrichment analysis: a knowledge-based approach for  
611 interpreting genome-wide expression profiles. *Proc. Natl. Acad. Sci. U. S. A.* **102**,  
612 15545–50 (2005).
- 613 67. Lai, L. *et al.* GSKB: A gene set database for pathway analysis in mouse. *bioRxiv* 082511  
614 (2016). doi:10.1101/082511
- 615 68. Piñero, J. *et al.* The DisGeNET knowledge platform for disease genomics: 2019 update.  
616 *Nucleic Acids Res.* **48**, D845–D855 (2020).
- 617

## 618 **FUNDING AND DISCLOSURE**

619 This study was funded by the UE Medbioinformatic project (grant number 634143),  
620 Ministerio de Economía y Competitividad (grant number SAF2016-75966-R-FEDER),  
621 Ministerio de Sanidad (Retic-ISCI, RD16/017/010 and Plan Nacional sobre Drogas 2018/007).  
622 The Department of Experimental and Health Sciences (UPF) is a “Unidad de Excelencia María  
623 de Maeztu” funded by the AEI (CEX2018-000792-M). The Research Programme on Biomedical  
624 Informatics (GRIB) is a member of the Spanish National Bioinformatics Institute (INB), funded  
625 by ISCI and FEDER (PT17/0009/0014). The GRIB is also supported by the Agència de Gestió  
626 d’Ajuts Universitaris i de Recerca (AGAUR), Generalitat de Catalunya (2017 SGR 00519).

## 627 **ACKNOWLEDGEMENTS**

628 The authors are indebted to the Oxford Genomics Centre at the Wellcome Centre for  
629 Human Genetics (funded by Wellcome Trust grant reference 203141/Z/16/Z) for the generation  
630 and initial processing of sequencing data. The authors wish to thank Adriana Castro-Zavala for  
631 her expertise and collaboration in tissue extraction for the RNA sample preparation.

## 632 **AUTHOR CONTRIBUTIONS**

633 A.M-S, L.N, L.I.F., F.S. and O.V. were responsible for the study concept and design.  
634 A.M-S. performed behavioural studies. A.M-S, E.M.R., A.H.N. and S.L. contributed to  
635 transcriptomic analysis. J.P., M.A., L.N., F.S. and L.I. F. carried out the bioinformatics analysis.  
636 All the authors participated in the interpretation of findings. A.M-S., F.S., and O.V. drafted the  
637 manuscript. All authors critically reviewed the content and approved the final version for  
638 publication.

## 639 **CONFLICTS OF INTEREST**

640 The authors declare no conflicts of interest regarding the work presented here.  
641  
642

643 FIGURES

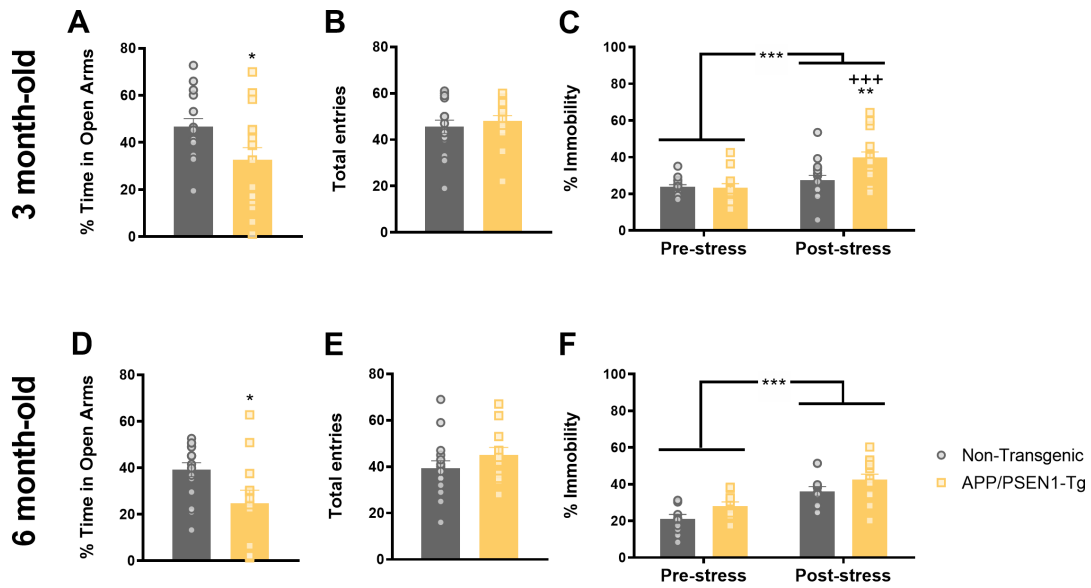

644

645 *Figure 1. APP/PSEN1-Tg animals show early anxiety-like and despair-like behaviours induced by stress.*

646 Panels A,B,D and E represent the EPM results, and panels C and F correspond to the TST results. Grey (Non-  
 647 Transgenic) and yellow (APP/PSEN1-Tg) bars represent the percentage of time spent in open arms (A, D) and total  
 648 number of entries (B,E) at 3 (n=16 per group) and 6 months (n=14 per group). (\*p < 0.05, Student's t-test Non-  
 649 Transgenic vs APP/PSEN1-Tg). Grey (Non-Transgenic) and yellow (APP/PSEN1-Tg) bars represent the percentage of  
 650 time that animals are immobile in TST at 3 (n=16 per group) (C) and 6 months-old (Non-Transgenic n=12,  
 651 APP/PSEN1-Tg n=14) (F) in pre-stress and post-stress conditions. Data are presented as mean ± SEM. \*\*\*p<0.001  
 652 Pre-stress vs post-stress condition; +++ p<0.001 comparison APP/PSEN1-Tg pre-stress vs post-stress, \*\*p<0.01  
 653 comparison APP/PSEN1-Tg vs Non-Transgenic post-stress condition. (two-way ANOVA).

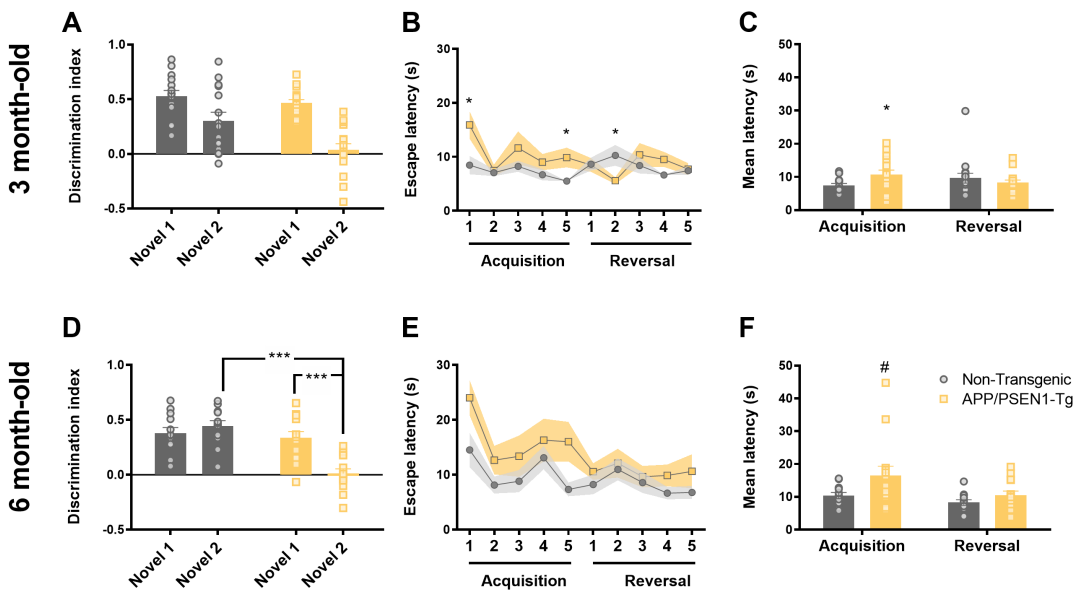

654

655 *Figure 2. The onset of memory impairments in APP/PSEN1-Tg occurs at 3months-old.*

656 Novel object recognition test: Grey (Non-Transgenic) and yellow (APP/PSEN1-Tg) bars represent the novel object 1  
 657 and 2 discrimination index (%) at 3 (A) (Non-Transgenic n=15, APP/PSEN1-Tg n=16) and 6 months old (D) (Non-  
 658 Transgenic n=12, APP/PSEN1-Tg n=14). Data are presented as mean  $\pm$  SEM. \* $p$ <0.05, \*\* $p$ < 0.01 (two-way ANOVA).  
 659 T-maze left-right discrimination learning: (B, E) Solid (Non-Transgenic) and dotted line (APP/PSEN1-Tg) represent  
 660 the escape latencies of both groups at two different ages. (ANOVA of repeated measurements \* $p$ <0.05; + $p$ <0.05  
 661 comparison APP/PSEN1-Tg vs the 1<sup>st</sup> trial; \* $p$ <0.05 comparison APP/PSEN1-Tg vs Non-Transgenic). (C, F) Grey  
 662 (Non-Transgenic) and yellow (APP/PSEN1-Tg) bars represent the mean  $\pm$  SEM trials to criterion during acquisition  
 663 and reversal phases latencies at 3 (n=16 per group) and 6 months-old (Non-Transgenic, n=12, APP/PSEN1-Tg n=14).  
 664 (F) At 6 months-old, transgenic mice tend to reach the criterion later than control groups during acquisition. (Student's  
 665 t-test, Non-Transgenic vs APP/PSEN1-Tg, \* $p$ <0.05; # $p$ =0.068).

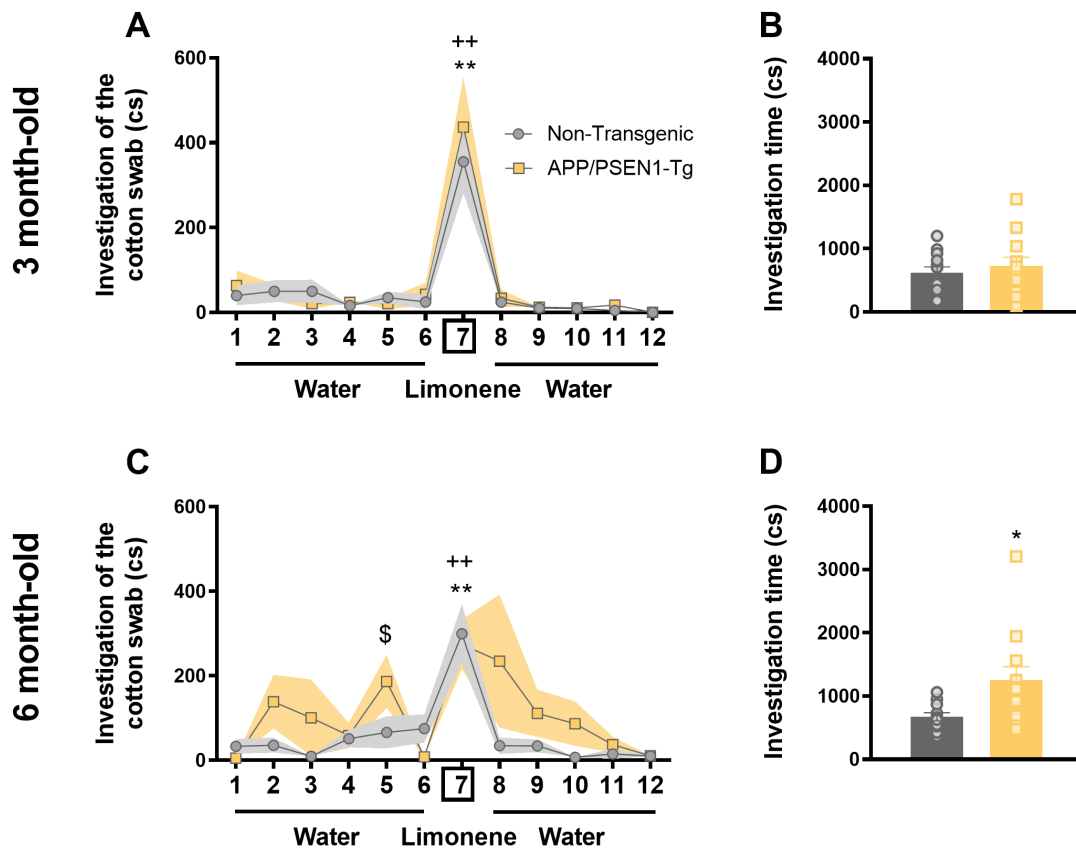

666  
 667 *Figure 3. APP/PSEN1-Tg mice show olfaction disruptions at 6 months old.*  
 668 Graphs show the time (centiseconds, cs) that APP/PSEN1-Tg and Non-Transgenic animals spent investigating a cotton  
 669 swab through consecutive one-minute presentations (mean  $\pm$  SEM) of distilled water (presentations 1-6 and 8-12) and  
 670 limonene (presentation 7) at 3 (A) and 6 months (C). The exploration time during the first presentation of the cotton  
 671 swab with water [1] was compared with that of the first presentation of limonene [7] in each group. (Wilcoxon test,  
 672 \*\* $p$ <0.01 comparison APP/PSEN1-Tg water vs limonene presentations; ++ $p$ <0.01 comparison Non-Transgenic water  
 673 vs limonene presentations; Kruskal-Wallis test \$ $p$ <0.05 comparison APP/PSEN1-Tg vs Non-Transgenic). Grey (Non-  
 674 Transgenic) and yellow (APP/PSEN1-Tg) bars represent the total investigation time at (B) 3 (n=12 per group) and 6  
 675 (D) months old (Non-Transgenic n=11, APP/PSEN1-Tg n=12) (Student's t-test \* $p$ <0.05). Data are presented as mean  
 676  $\pm$  SEM.

677  
 678

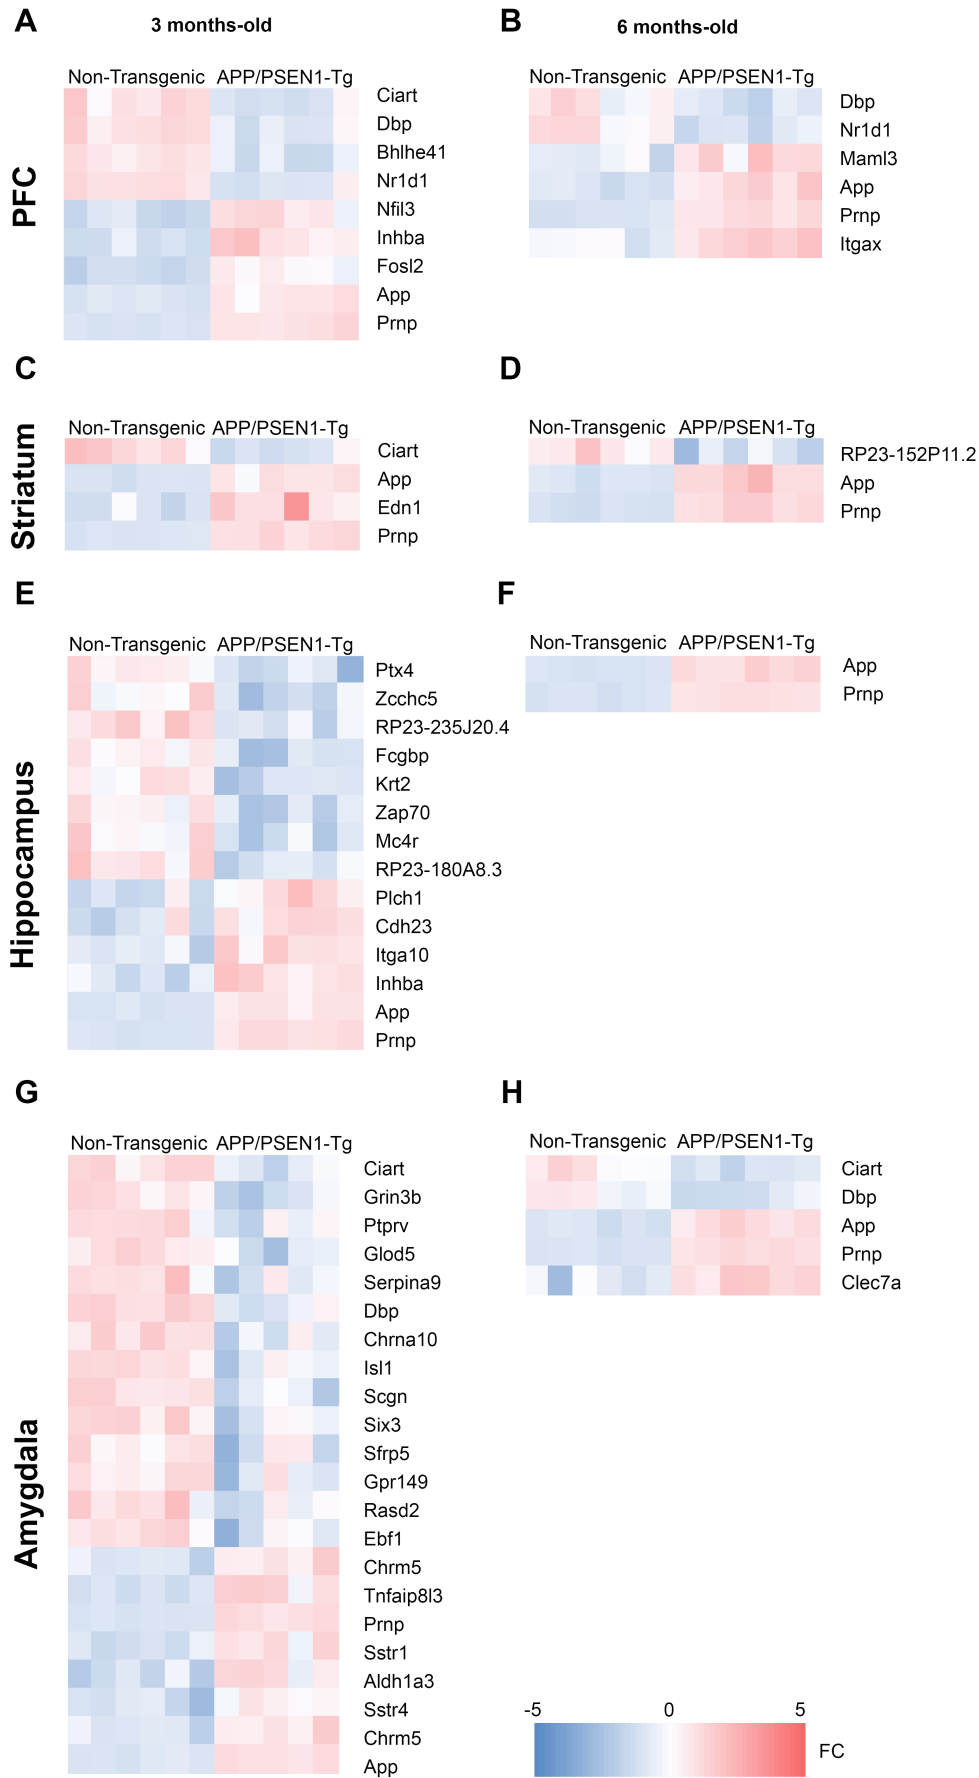



680 *Figure 4. Differentially expressed genes in the PFC, striatum, hippocampus and amygdala from APP/PSEN1-Tg*  
 681 *mice at 3 and 6 months-old.*  
 682 Heatmaps representing the degree of change for the differentially expressed genes at 3 (A,C,E,G) and 6 (B,D,F,H)  
 683 months between control and APP/PSEN1-Tg (5-6 independent brain samples per area). (G) The heatmap from  
 684 amygdala at 3 month-old is a reduced representation from >100 up and downregulated genes ( $p < 0.05; |\log FC| > 0.59$ ).  
 685 Legend (bottom) indicates the color-coded fold-change scale ( $-5 < FC < 5$ ) where negative values represen  
 686 downregulation in blue, and positive upregulation in red.

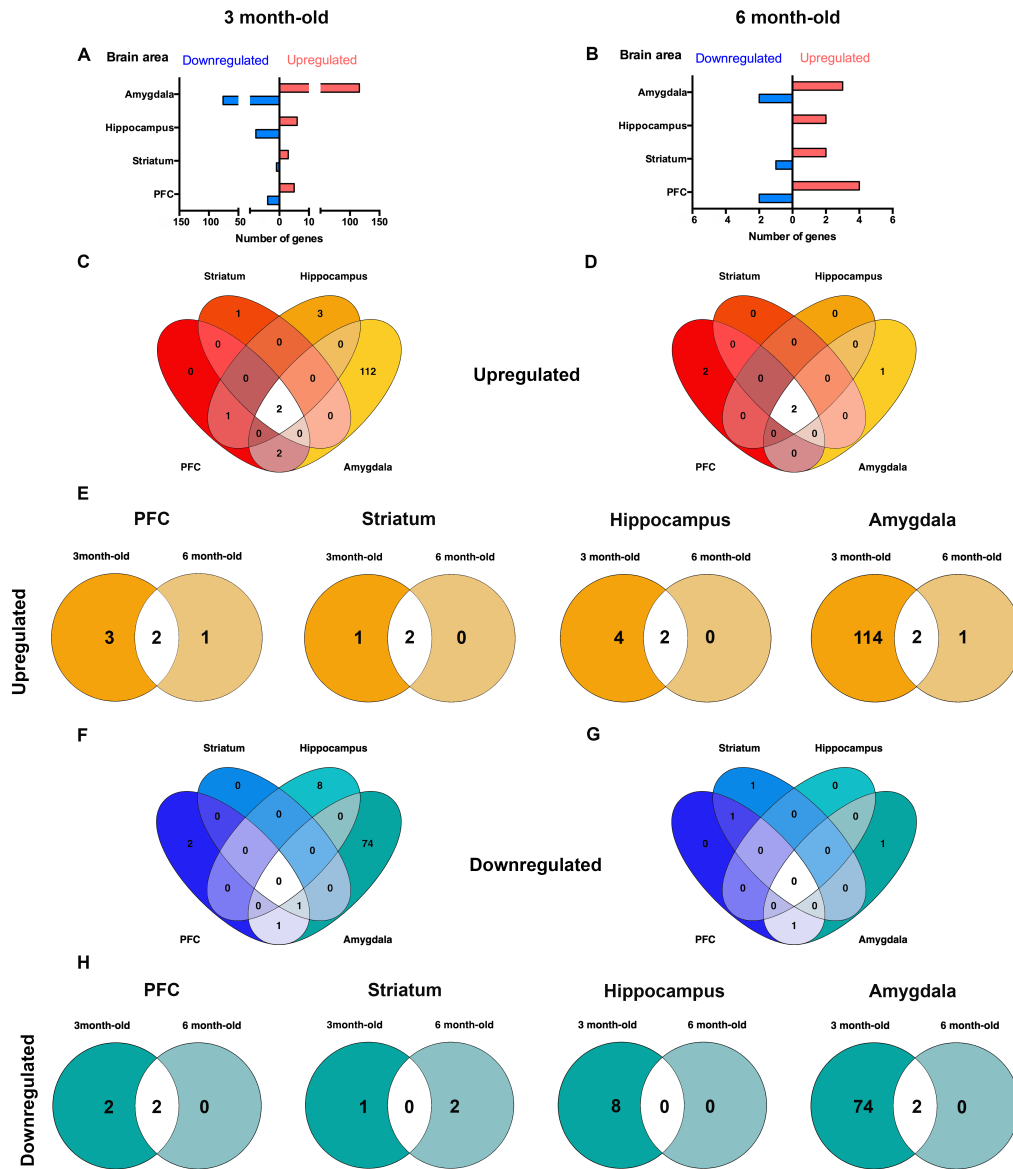

687 *Figure 5. Distribution pattern of differentially expressed genes from APP/PSEN1-Tg mice model.*  
 688 Total number of up (red bars) and downregulated (blue bars) genes within amygdala, hippocampus, striatum and PFC  
 689 at (A) 3 months and (B) 6 months. Venn diagrams show the number of differentially expressed genes among areas, in  
 690 an upregulated (C,D) and downregulated (F,G) way. Venn diagrams show the number of upregulated (E) and  
 691 downregulated (H) shared genes between 3 and 6 months old of age APP/PSEN1-Tg (n=6 per group) vs Non-  
 692 Transgenic mice (n=6 per group).  
 693

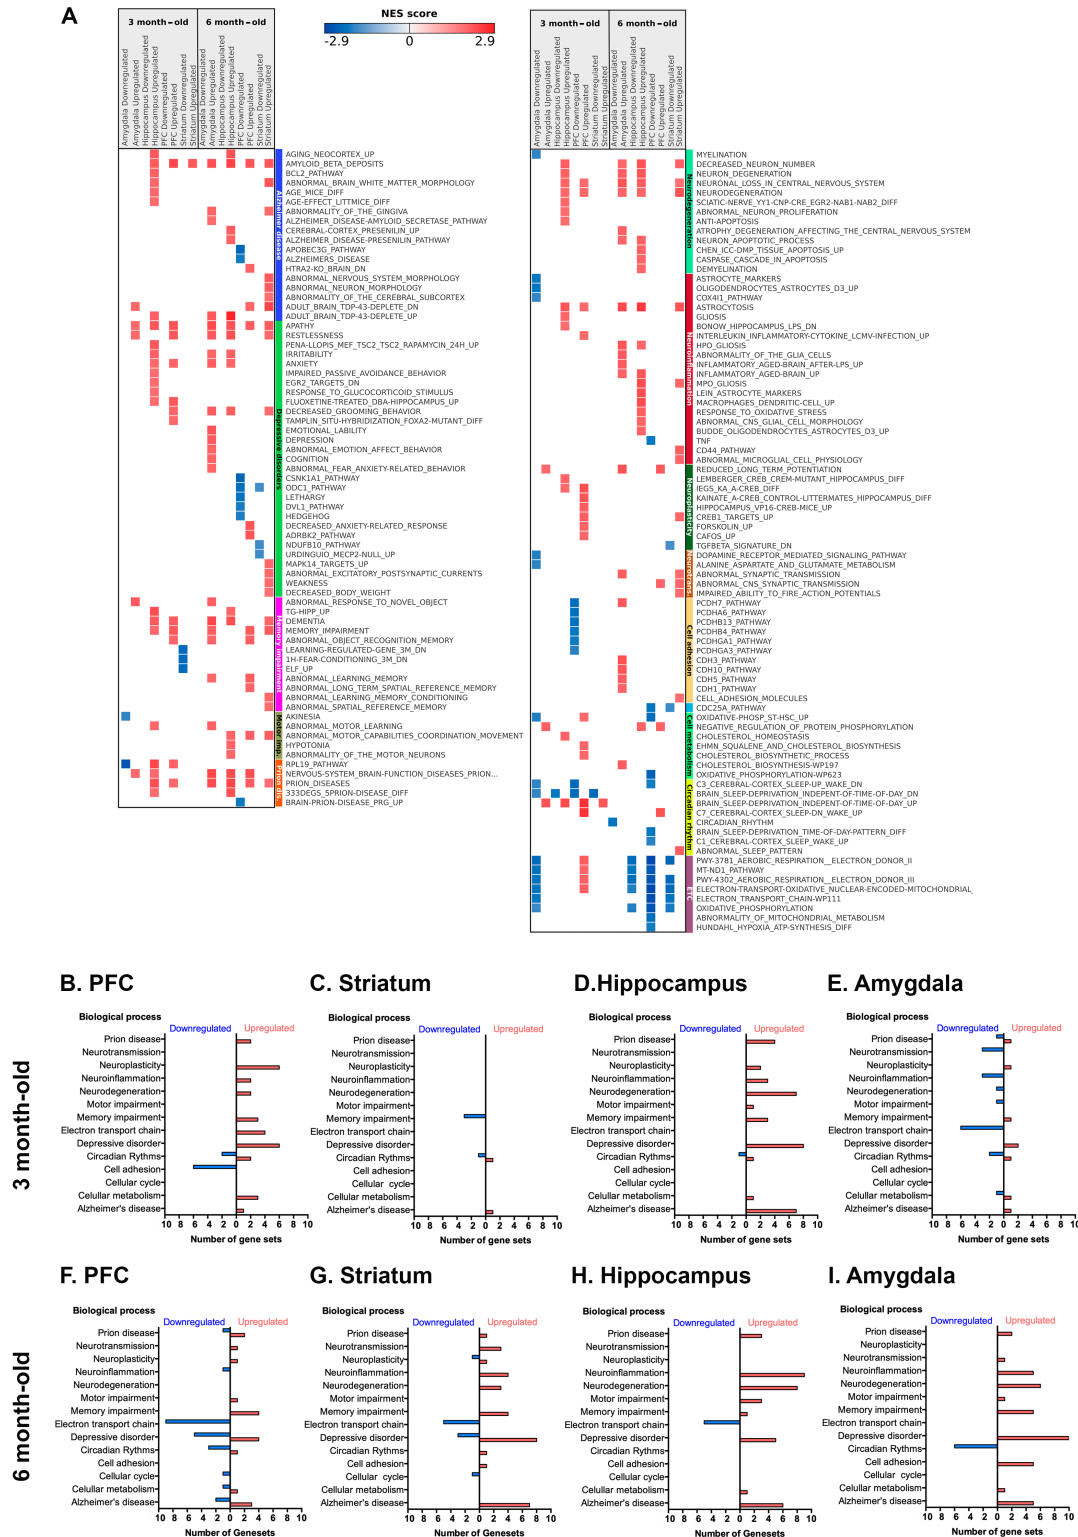

694  
695  
696  
697  
698  
699  
700  
701  
702

Figure 6. Comparison of differentially expressed gene sets in *APP/PSEN1-Tg* mice in PFC, striatum, hippocampus and amygdala.

(A) The heatmap represents some selected up and downregulated gene sets at 3 and 6 month-old included in different biological processes: Alzheimer disease, depressive disorders, memory impairment, prion disease, motor impairment (Motor imp.), neurodegeneration, neuroinflammation, neuroplasticity, neurotransmission (Neurotrans.), cell adhesion, circadian rhythm, electronic transport chain (ETC). (FDR  $q$  value  $< 0.05$ ;  $|NES| > 1.4$ ). List of the total number of differentially expressed gene sets ordered by biological processes found in PFC (B,F), striatum (C,G), hippocampus (D,G) and amygdala (E,J) at 3 and 6 months old, respectively. Red bars (positive) represent the upregulated expressed

703 gene sets and the blue bars (negative) show downregulated gene sets in each area. For the GSEA we only included  
704 those gene sets with FDR q value  $<0.05$  and  $|NES| > 1.4$ .  
705
